# Supplementary material for: Global distribution maps of the leishmaniases
Source: eLife journal article supplement (doi:10.7554/elife.02851), 2014-06-27
Supplement: figures [file elife-02851-figures-v2.pdf]

---

## Figures and figure supplements

Global distribution maps of the leishmaniasis

**David M Pigott, et al.**

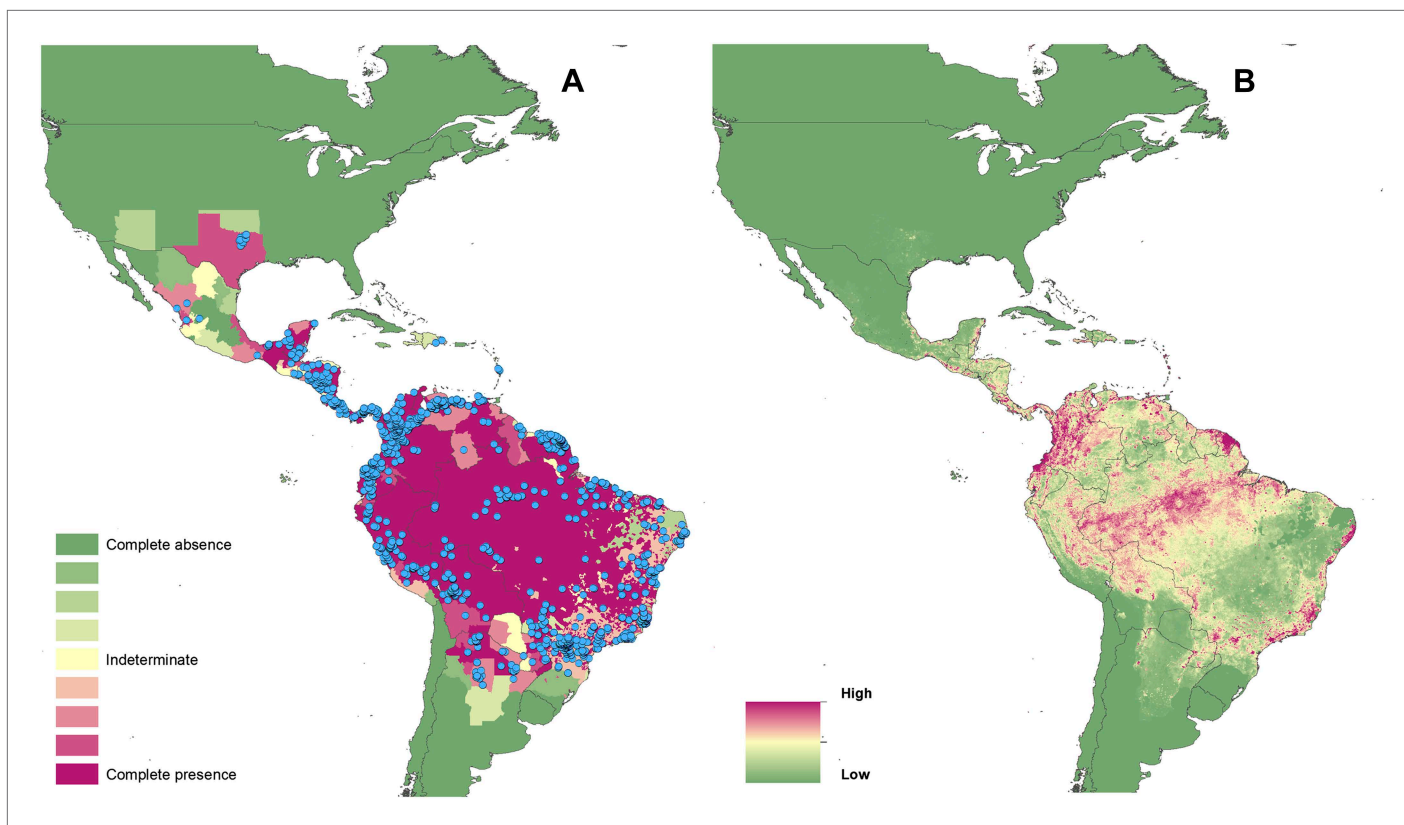

**Figure 1.** Reported and predicted distribution of cutaneous leishmaniasis in the New World. **(A)** Evidence consensus for presence of the disease ranging from green (complete consensus on the absence:  $-100\%$ ) to purple (complete consensus on the presence of disease:  $+100\%$ ). The blue spots indicate occurrence points or centroids of occurrences within small polygons. **(B)** Predicted risk of cutaneous leishmaniasis from green (low probability of presence) to purple (high probability of presence).

DOI: [10.7554/eLife.02851.003](https://doi.org/10.7554/eLife.02851.003)

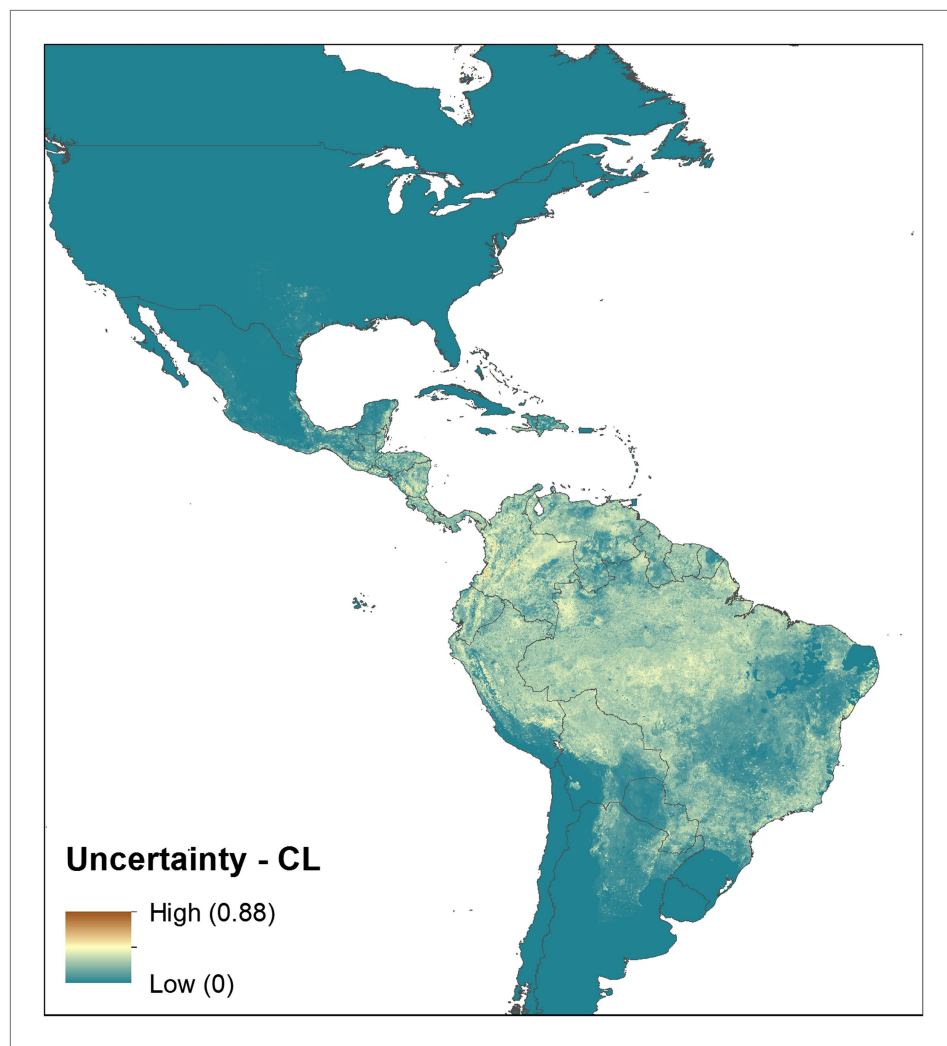

**Figure 1—figure supplement 1.** Uncertainty associated with predictions in **Figure 1B**.

DOI: [10.7554/eLife.02851.004](https://doi.org/10.7554/eLife.02851.004)

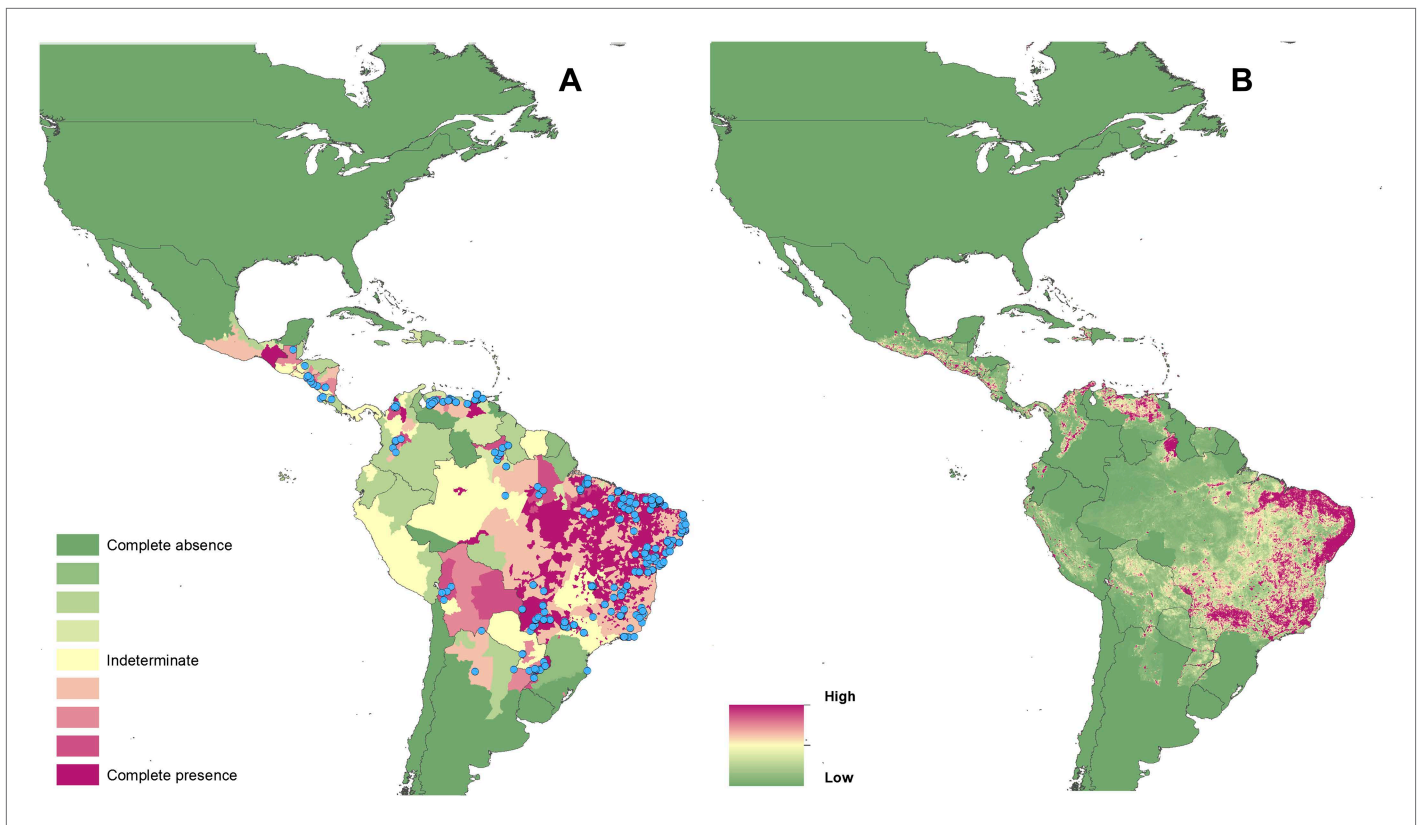

**Figure 2.** Reported and predicted distribution of visceral leishmaniasis in the New World. **(A)** Evidence consensus for presence of the disease ranging from green (complete consensus on the absence:  $-100\%$ ) to purple (complete consensus on the presence of disease:  $+100\%$ ). The blue spots indicate occurrence points or centroids of occurrences within small polygons. **(B)** Predicted risk of visceral leishmaniasis from green (low probability of presence) to purple (high probability of presence).

DOI: [10.7554/eLife.02851.005](https://doi.org/10.7554/eLife.02851.005)

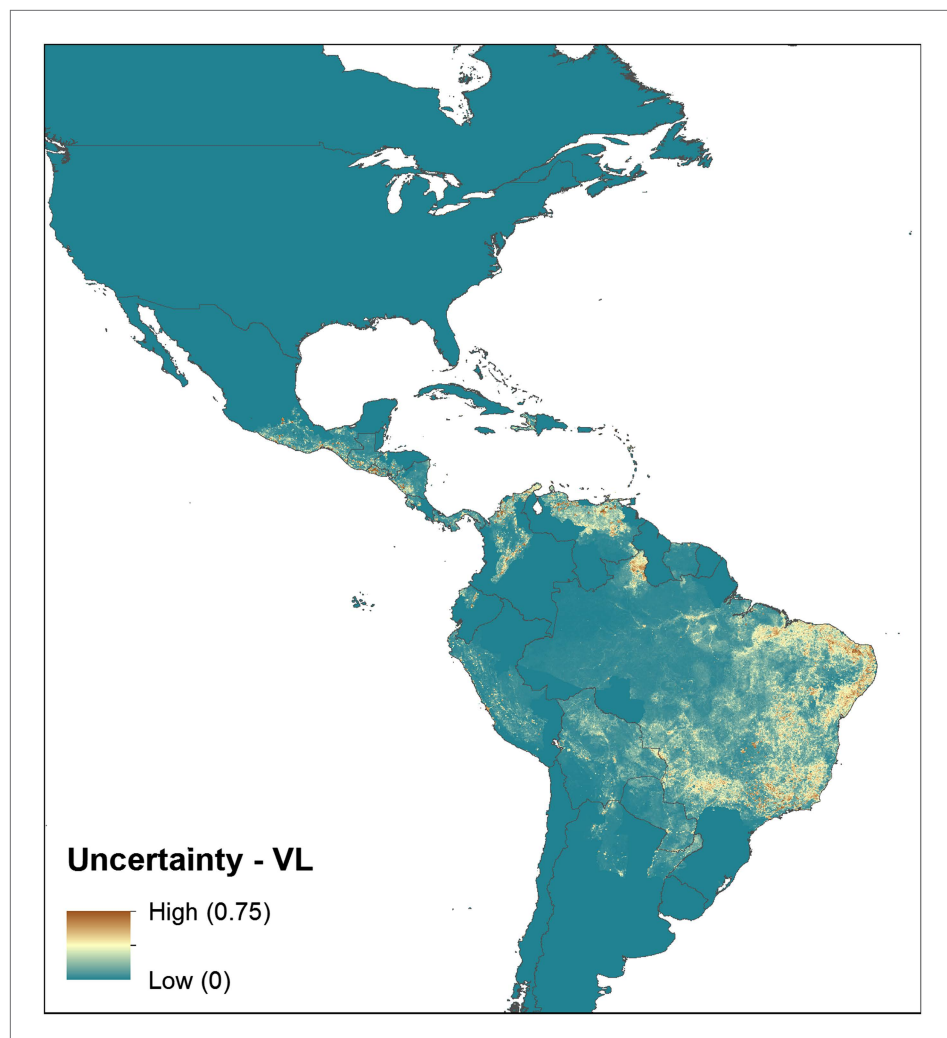

**Figure 2—figure supplement 1.** Uncertainty associated with predictions in **Figure 2B**.

DOI: [10.7554/eLife.02851.006](https://doi.org/10.7554/eLife.02851.006)

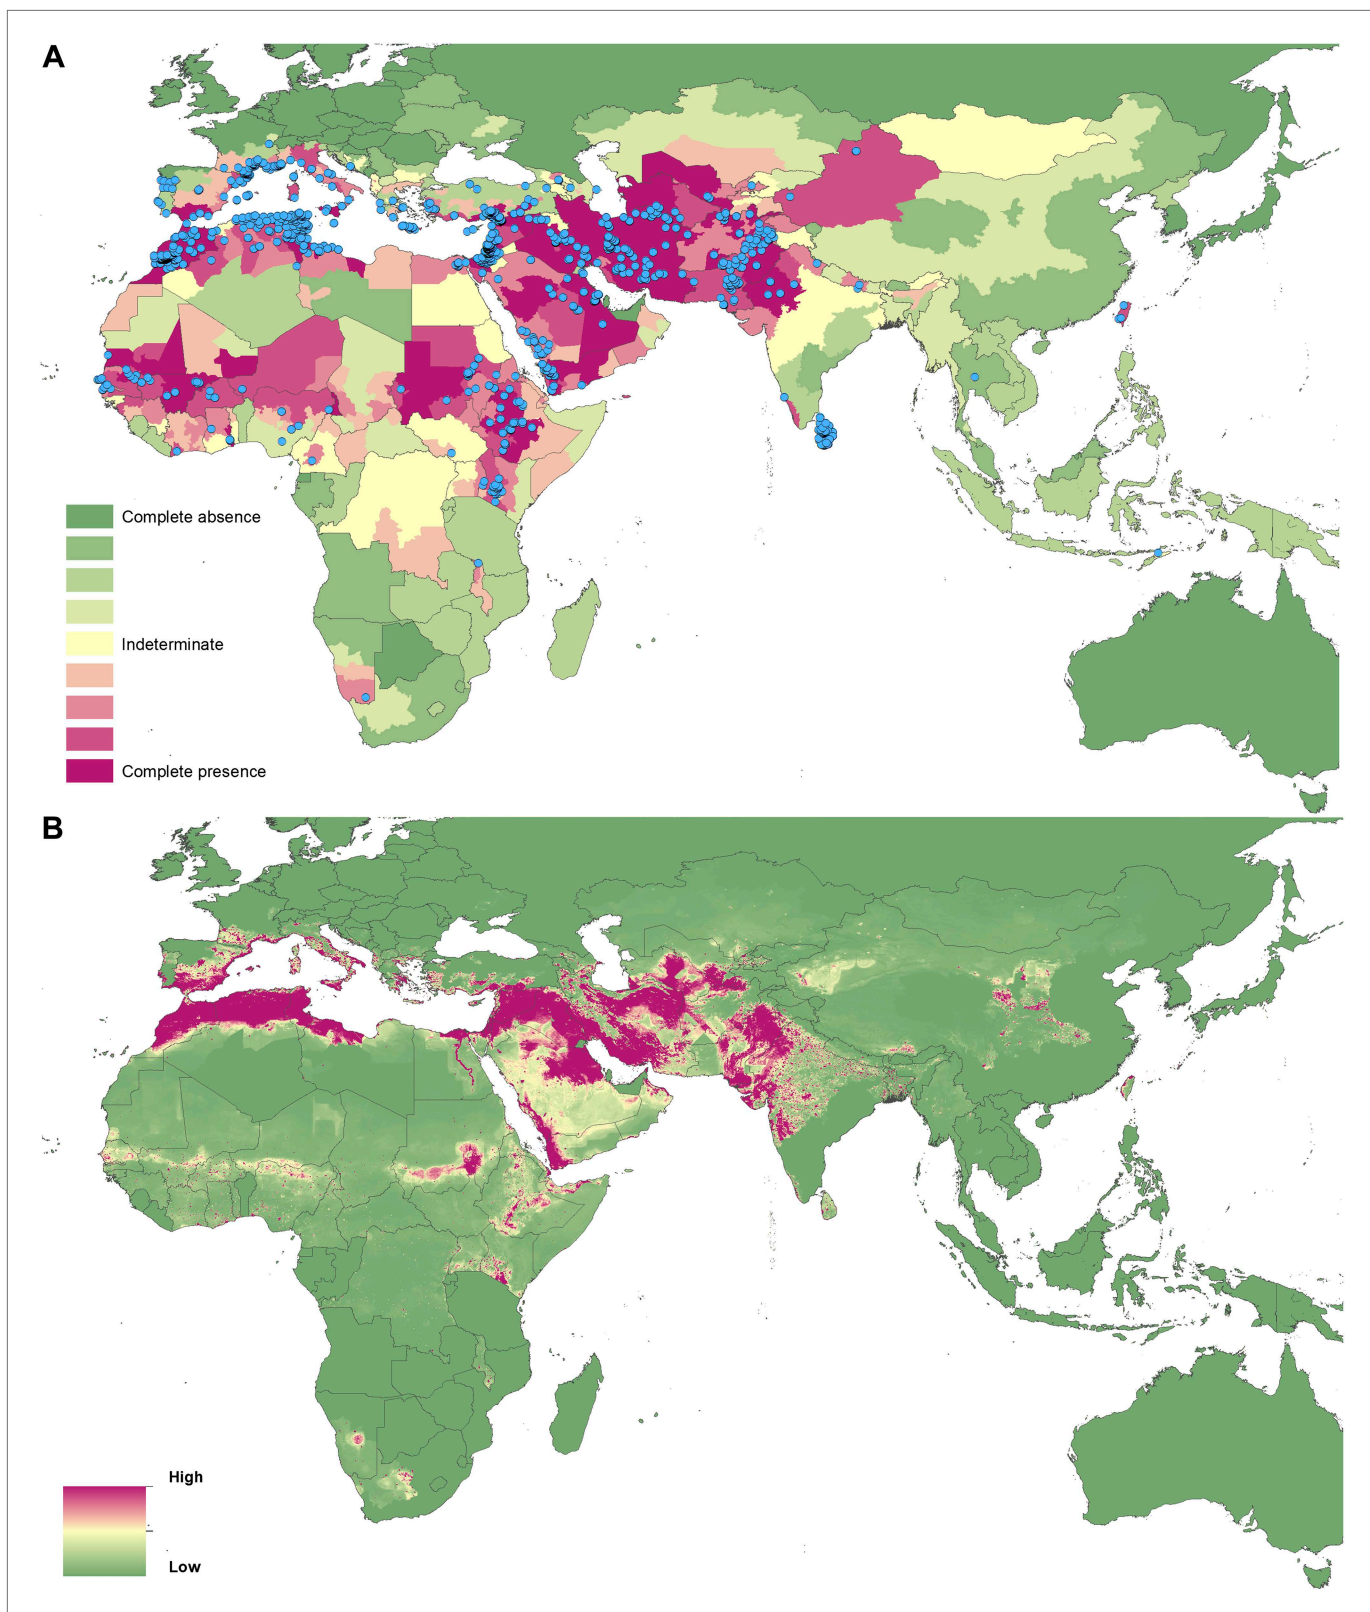

**Figure 3.** Reported and predicted distribution of cutaneous leishmaniasis in the Old World. **(A)** Evidence consensus for presence of the disease ranging from green (complete consensus on the absence:  $-100\%$ ) to purple (complete consensus on the presence of disease:  $+100\%$ ). The blue spots indicate occurrence points or centroids of occurrences within small polygons. **(B)** Predicted risk of cutaneous leishmaniasis from green (low probability of presence) to purple (high probability of presence).

DOI: [10.7554/eLife.02851.007](https://doi.org/10.7554/eLife.02851.007)



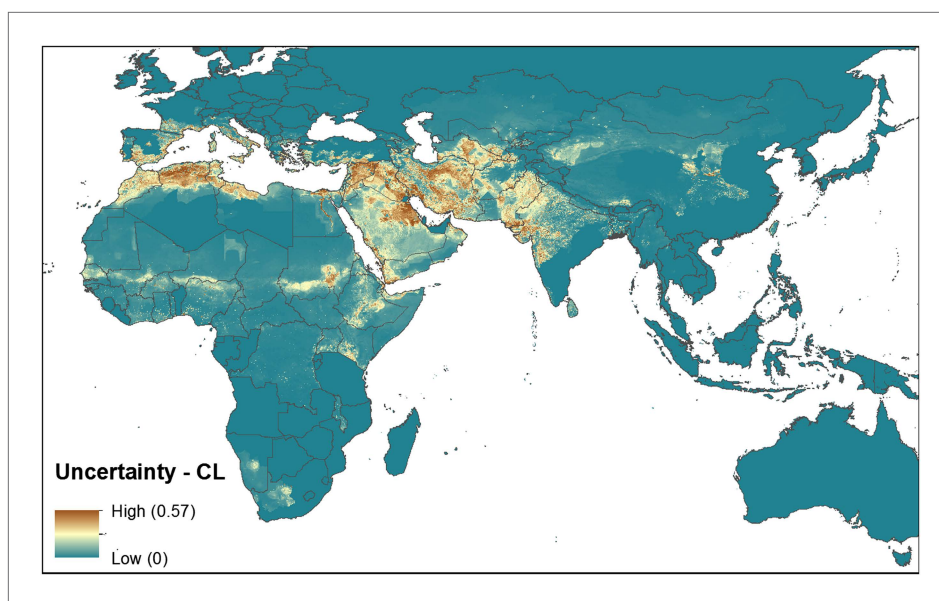

**Figure 3—figure supplement 1.** Uncertainty associated with predictions in **Figure 3B**.

DOI: [10.7554/eLife.02851.008](https://doi.org/10.7554/eLife.02851.008)

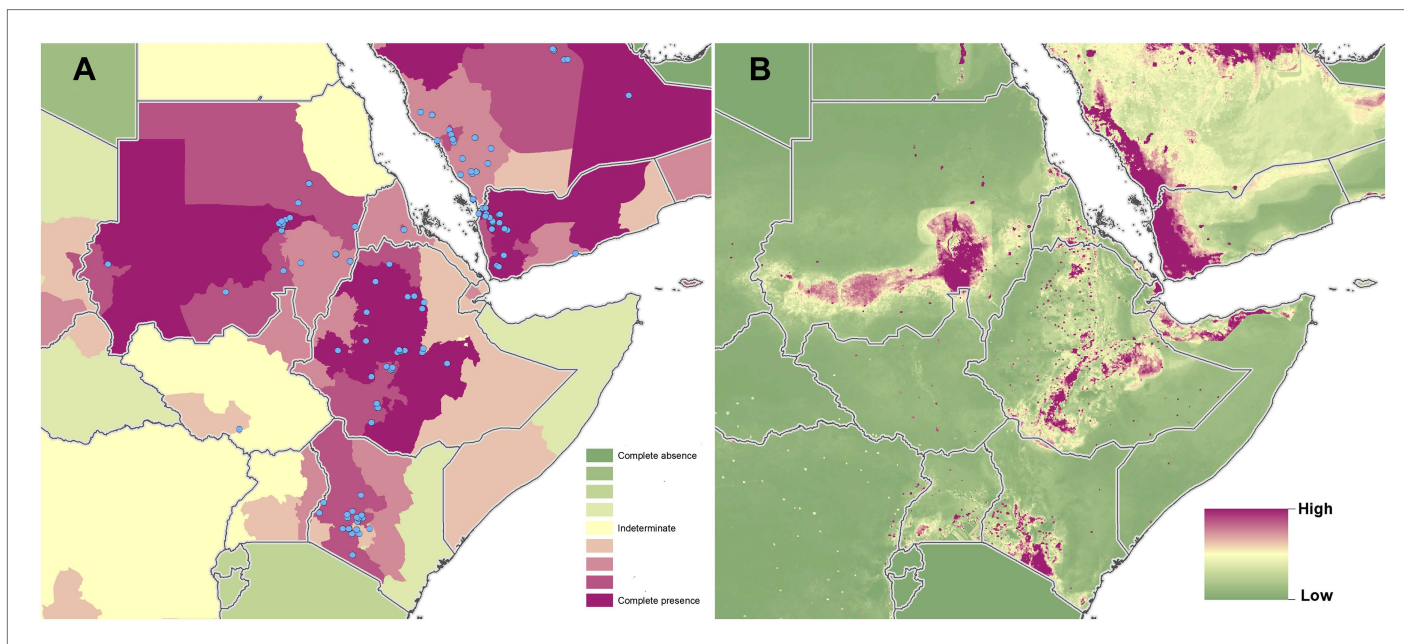

**Figure 3—figure supplement 2.** Reported and predicted distribution of cutaneous leishmaniasis in northeast Africa.

DOI: [10.7554/eLife.02851.009](https://doi.org/10.7554/eLife.02851.009)

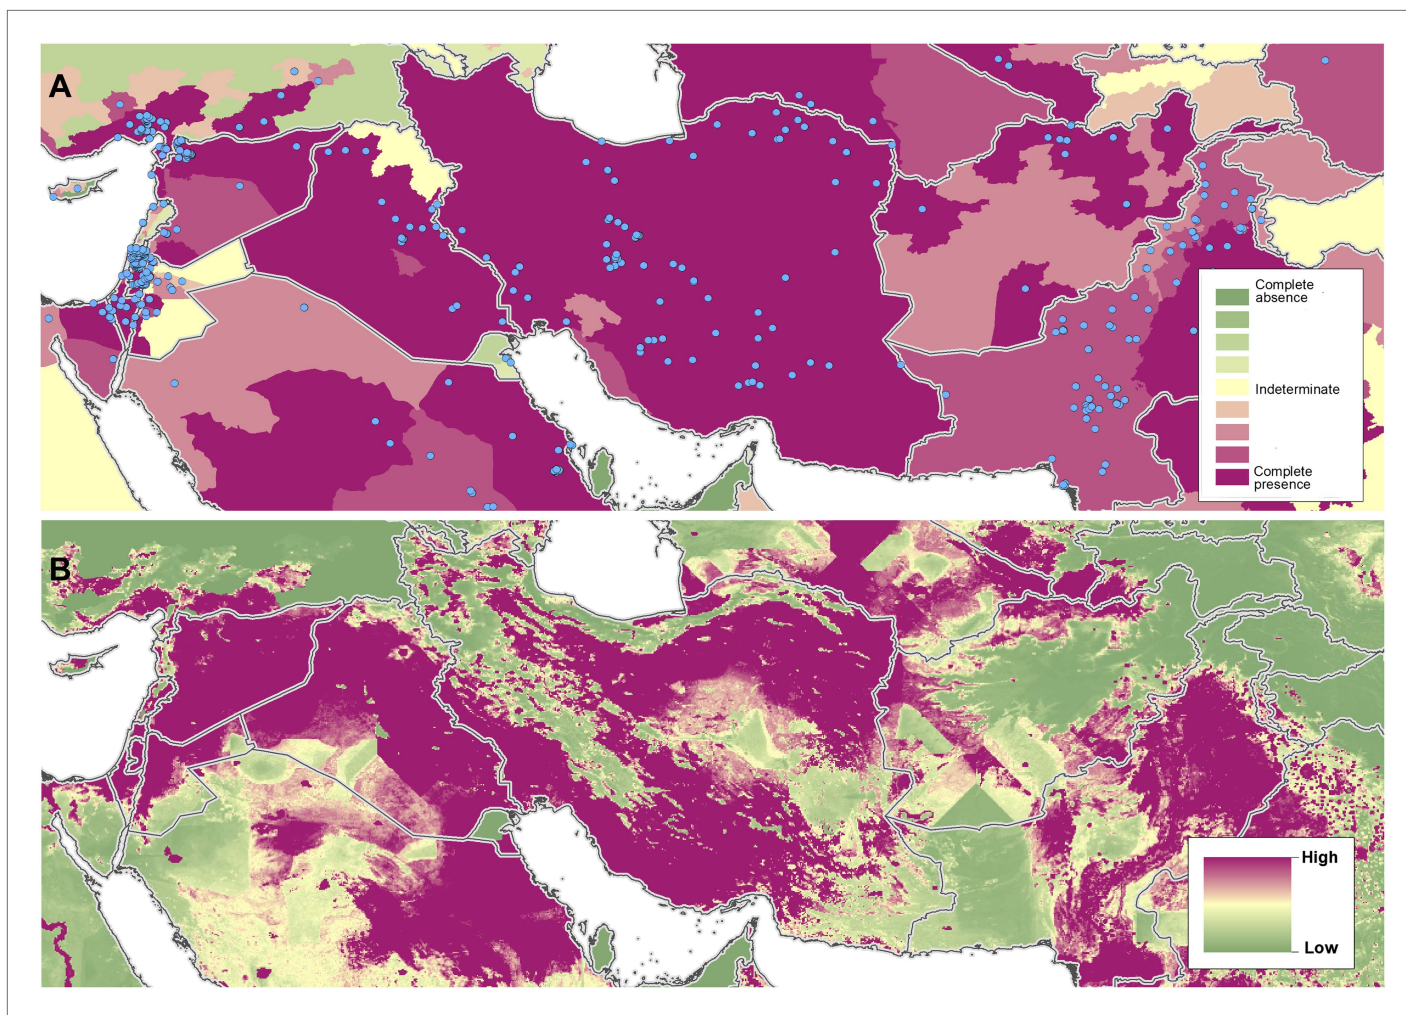

**Figure 3—figure supplement 3.** Reported and predicted distribution of cutaneous leishmaniasis across the Near East, including Syria, Iran and Afghanistan.

DOI: [10.7554/eLife.02851.010](https://doi.org/10.7554/eLife.02851.010)



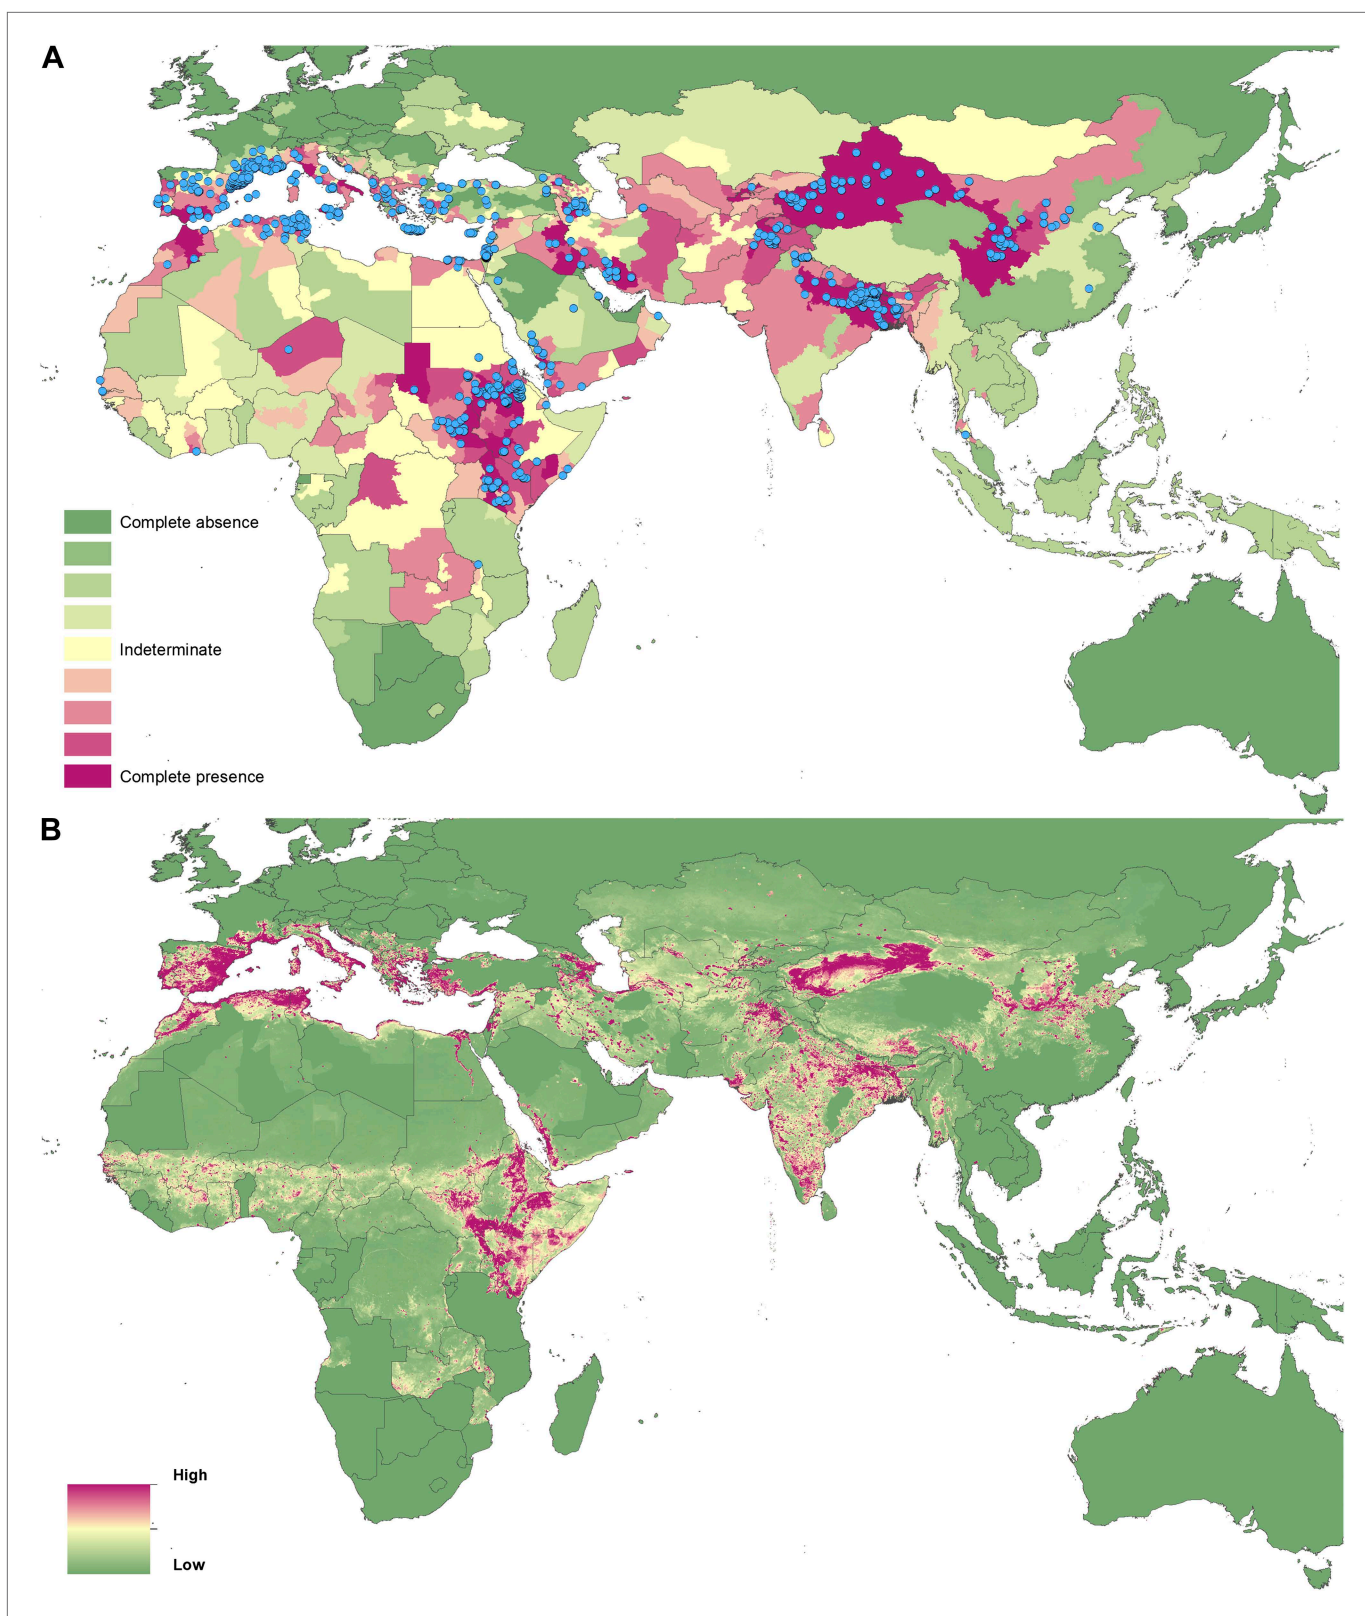

**Figure 4.** Reported and predicted distribution of visceral leishmaniasis in the Old World. **(A)** Evidence consensus for presence of the disease ranging from green (complete consensus on the absence:  $-100\%$ ) to purple (complete consensus on the presence of disease:  $+100\%$ ). The blue spots indicate occurrence points or centroids of occurrences within small polygons. **(B)** Predicted risk of visceral leishmaniasis from green (low probability of presence) to purple (high probability of presence).

DOI: [10.7554/eLife.02851.011](https://doi.org/10.7554/eLife.02851.011)

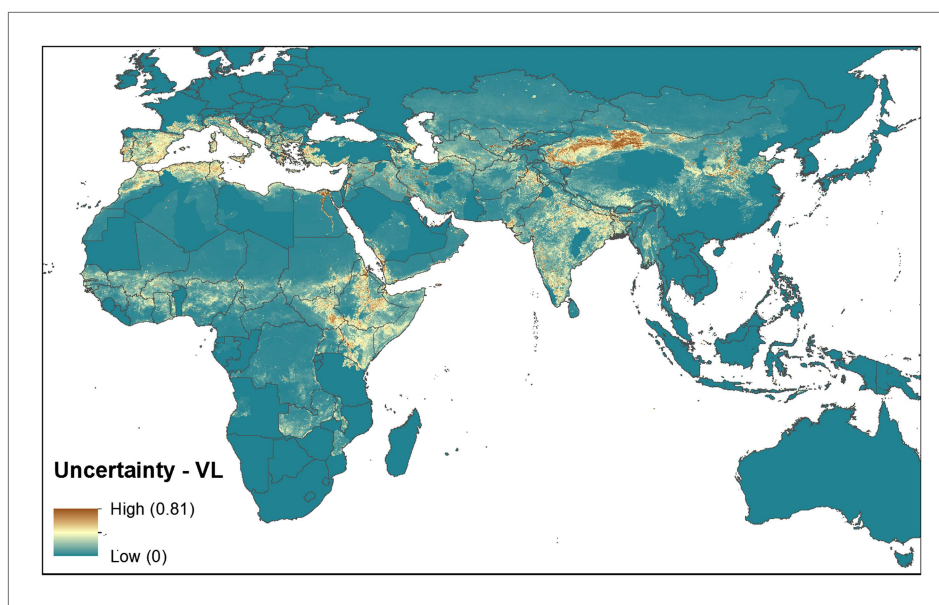

**Figure 4—figure supplement 1.** Uncertainty associated with predictions in **Figure 4B**.

DOI: [10.7554/eLife.02851.012](https://doi.org/10.7554/eLife.02851.012)

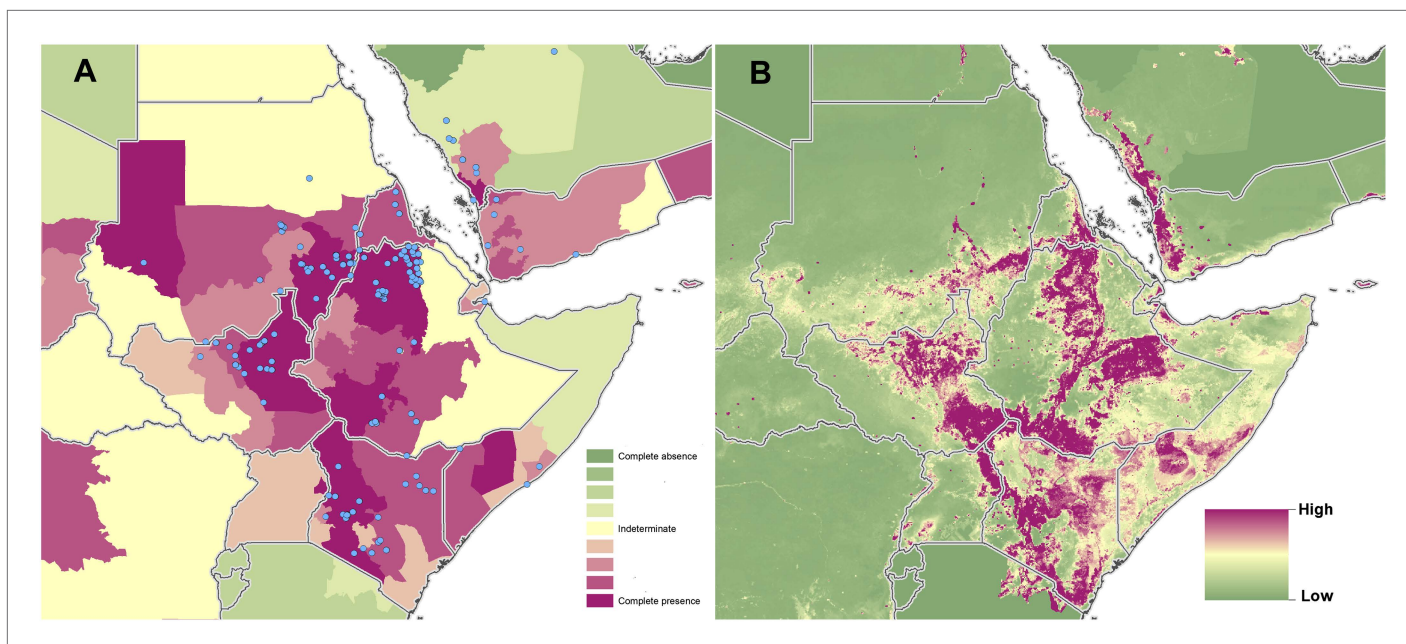

**Figure 4—figure supplement 2.** Reported and predicted distribution of visceral leishmaniasis in northeast Africa.

DOI: [10.7554/eLife.02851.013](https://doi.org/10.7554/eLife.02851.013)

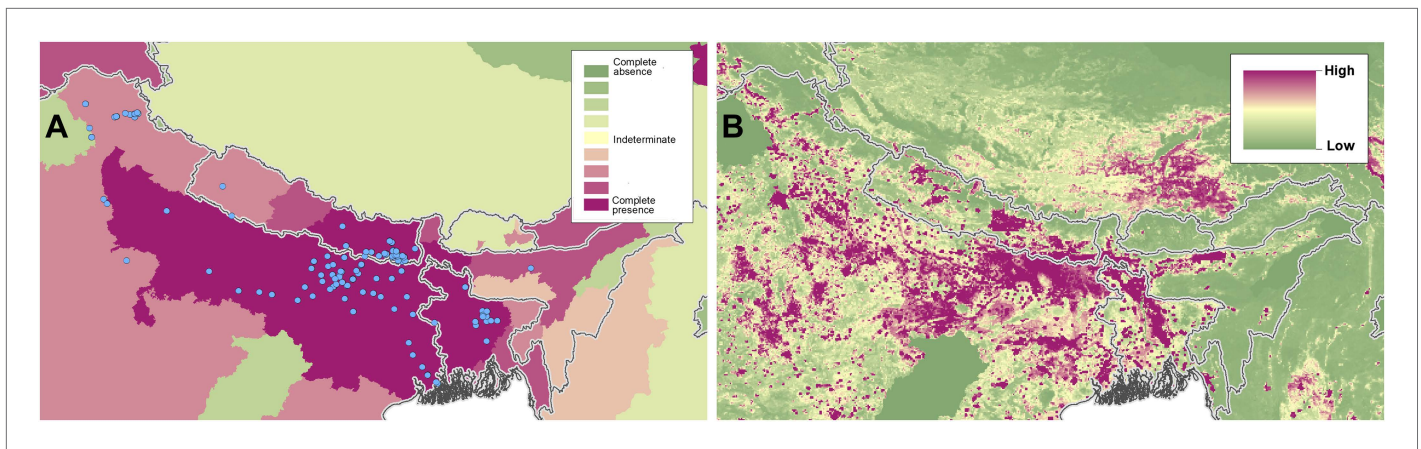

**Figure 4—figure supplement 3.** Reported and predicted distribution of visceral leishmaniasis in the Indian subcontinent.

DOI: [10.7554/eLife.02851.014](https://doi.org/10.7554/eLife.02851.014)

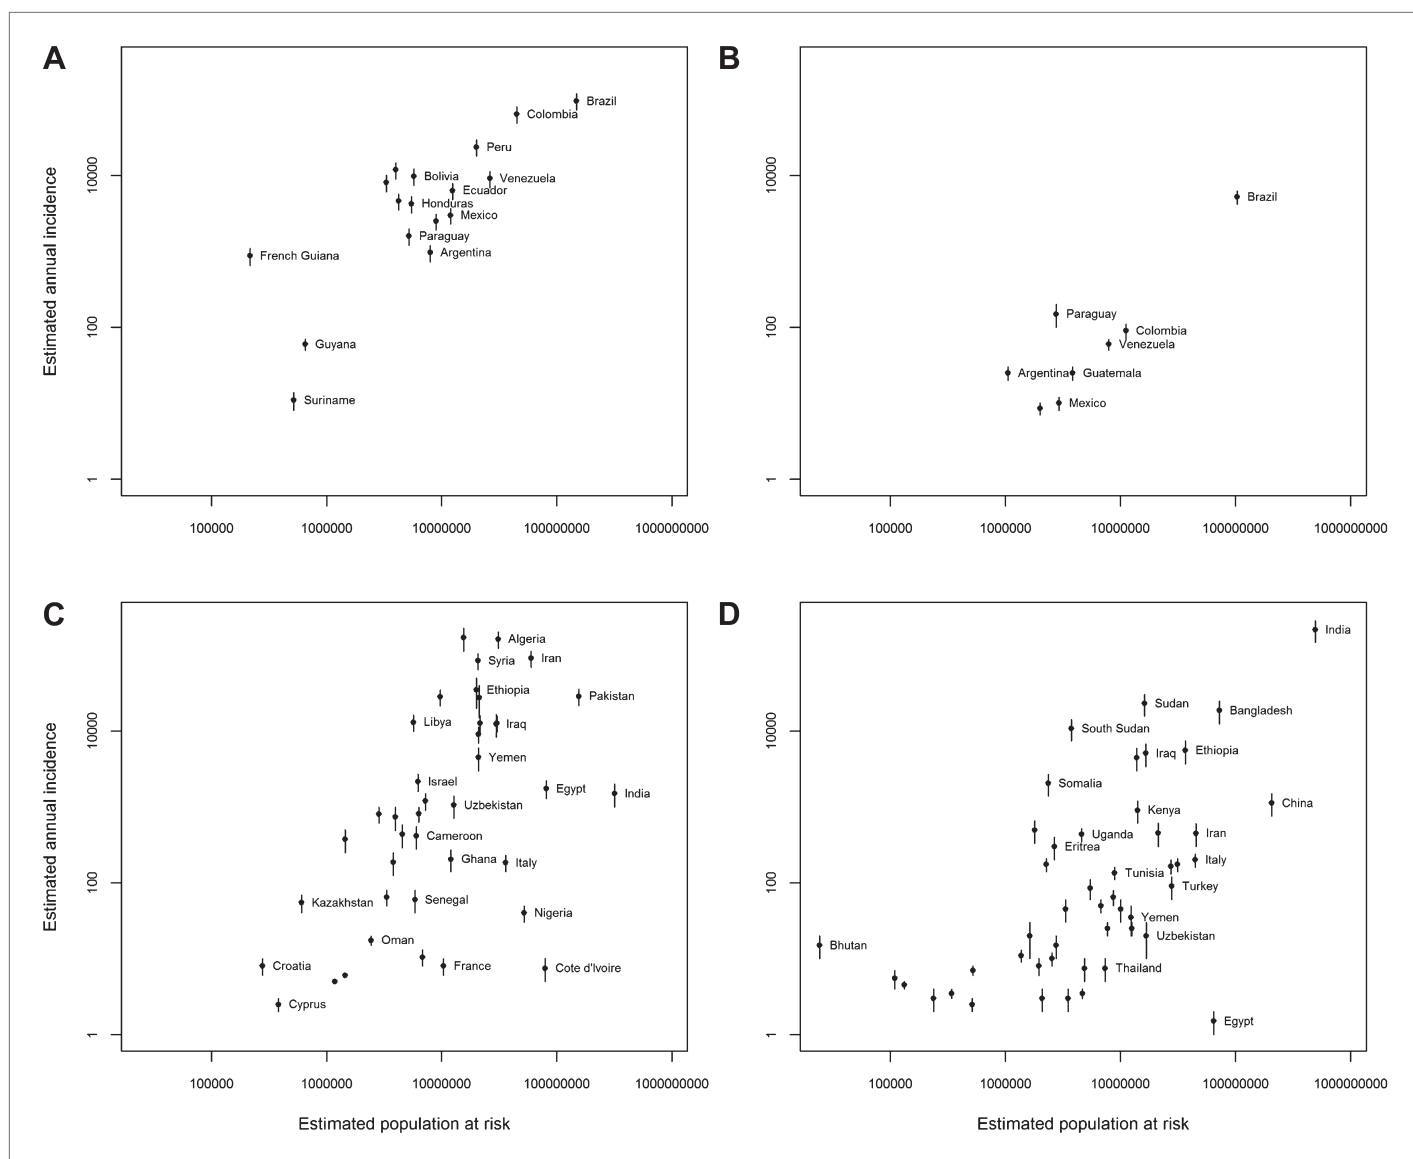

**Figure 4—figure supplement 4.** Population at risk estimates for leishmaniasis.

DOI: [10.7554/eLife.02851.015](https://doi.org/10.7554/eLife.02851.015)
